# Supplementary material for: The effect of morning vs evening exercise training on glycaemic control and serum metabolites in overweight/obese men: a randomised trial
Source: PubMed Central journal article supplement (PMC8382617; doi:10.1007/s00125-021-05477-5), 2021-05-19
Supplement: 125_2021_5477_MOESM1_ESM.pdf [file 125_2021_5477_MOESM1_ESM.pdf]

**ESM Table 1.** Time in bed, according to group, as estimated by ActivPal inclinometer. Values are mean  $\pm$  SD. *P* values are from paired t-tests.

| Group   | 5-d high-fat diet | Exercise/no exercise | <i>p</i> value |
|---------|-------------------|----------------------|----------------|
| Control | 8.2 $\pm$ 1.4     | 8.4 $\pm$ 1.3        | 0.62           |
| EXam    | 7.7 $\pm$ 1.3     | 7.3 $\pm$ 1.0        | 0.20           |
| EXpm    | 8.3 $\pm$ 0.8     | 8.9 $\pm$ 1.2        | 0.22           |

**ESM Table 2.** Fasting and postprandial circulating markers of metabolic health and blood pressure before and after five days of high fat diet. Data are observed means  $\pm$  SD. *P* values from paired samples t-tests.

|                                 | Habitual diet ( <i>n</i> =24) | High fat diet ( <i>n</i> =24) | <i>p</i> value |
|---------------------------------|-------------------------------|-------------------------------|----------------|
| <b>Fasting</b>                  |                               |                               |                |
| Glucose (mmol/l)                | 4.9 $\pm$ 0.4                 | 4.8 $\pm$ 0.3                 | 0.07           |
| Insulin (pmol/l)                | 69 $\pm$ 44                   | 71 $\pm$ 47                   | 0.77           |
| HOMA-IR                         | 2.21 $\pm$ 1.5                | 2.16 $\pm$ 1.6                | 0.96           |
| Cholesterol (mmol/l)            | 4.8 $\pm$ 0.8                 | 4.8 $\pm$ 0.8                 | 0.60           |
| Triacylglycerol (mmol/l)        | 1.54 $\pm$ 0.7                | 1.25 $\pm$ 0.6                | <b>0.03</b>    |
| HDL (mmol/l)                    | 1.04 $\pm$ 0.2                | 1.05 $\pm$ 0.1                | 0.63           |
| LDL (mmol/l)                    | 3.0 $\pm$ 0.7                 | 3.2 $\pm$ 0.7                 | <b>0.049</b>   |
| Systolic blood pressure (mmHg)  | 130 $\pm$ 9                   | 126 $\pm$ 10                  | 0.06           |
| Diastolic blood pressure (mmHg) | 84 $\pm$ 6                    | 82 $\pm$ 5                    | 0.06           |
| <b>Postprandial</b>             |                               |                               |                |
| Glucose (mmol/l)                | 5.1 $\pm$ 1.0                 | 5.1 $\pm$ 0.5                 | 0.92           |
| Insulin (pmol/l)                | 432 $\pm$ 420                 | 328 $\pm$ 243                 | 0.15           |
| Cholesterol (mmol/l)            | 4.8 $\pm$ 0.8                 | 5.0 $\pm$ 0.8                 | 0.08           |
| Triacylglycerol (mmol/l)        | 2.4 $\pm$ 1.2                 | 2.3 $\pm$ 1.0                 | 0.52           |
| HDL (mmol/l)                    | 1.0 $\pm$ 0.2                 | 1.1 $\pm$ 0.1                 | 0.06           |
| LDL (mmol/l)                    | 2.7 $\pm$ 0.8                 | 2.9 $\pm$ 0.7                 | 0.18           |

**ESM Table 3.** Metabolites significantly changed in morning samples after 5 d high-fat diet.

|                                                       | <b>change</b> | <b><i>p</i> value</b> | <b><i>q</i> value</b> |
|-------------------------------------------------------|---------------|-----------------------|-----------------------|
| (N(1) + N(8))-acetylsermidine                         | 15%           | 0.0022                | 0.0090                |
| 1-(1-enyl-palmitoyl)-2-arachidonoyl-GPE (P-16:0/20:4) | 17%           | 0.0099                | 0.0294                |
| 1-(1-enyl-palmitoyl)-GPC (P-16:0)                     | -12%          | 0.0011                | 0.0053                |
| 1-(1-enyl-stearoyl)-2-arachidonoyl-GPE (P-18:0/20:4)  | 29%           | <0.0001               | <0.0001               |
| 1.2-dilinoleoyl-GPC (18:2/18:2)                       | -20%          | <0.0001               | 0.0003                |
| 1.2-dilinoleoyl-GPE (18:2/18:2)                       | -13%          | 0.0037                | 0.0137                |
| 1.2-dipalmitoyl-GPE (16:0/16:0)                       | -29%          | 0.0006                | 0.0031                |
| 1.3-dimethylurate                                     | 38%           | 0.0098                | 0.0293                |
| 1.5-anhydroglucitol (1.5-AG)                          | -3%           | 0.0093                | 0.0280                |
| 1.7-dimethylurate                                     | 32%           | 0.0014                | 0.0065                |
| 10-nonadecenoate (19:1n9)                             | 42%           | 0.0043                | 0.0152                |
| 10-undecenoate (11:1n1)                               | 48%           | 0.0040                | 0.0145                |
| 12.13-DiHOME                                          | 697%          | <0.0001               | 0.0001                |
| 1-arachidonoyl-GPE (20:4n6)                           | -7%           | 0.0173                | 0.0463                |
| 1-carboxyethylisoleucine                              | -38%          | <0.0001               | 0.0001                |
| 1-carboxyethylleucine                                 | -13%          | 0.0147                | 0.0407                |
| 1-carboxyethylphenylalanine                           | -35%          | <0.0001               | 0.0001                |
| 1-carboxyethylvaline                                  | -22%          | 0.0001                | 0.0006                |
| 1-lignoceroyl-GPC (24:0)                              | -27%          | 0.0002                | 0.0015                |
| 1-linolenoyl-GPC (18:3)                               | -45%          | <0.0001               | 0.0003                |
| 1-linoleoyl-2-arachidonoyl-GPC (18:2/20:4n6)          | -9%           | 0.0023                | 0.0095                |
| 1-linoleoyl-2-linolenoyl-GPC (18:2/18:3)              | -37%          | 0.0001                | 0.0006                |
| 1-linoleoyl-GPC (18:2)                                | -11%          | 0.0010                | 0.0046                |
| 1-linoleoyl-GPE (18:2)                                | -24%          | 0.0007                | 0.0035                |
| 1-linoleoyl-GPI (18:2)                                | -19%          | 0.0119                | 0.0344                |
| 1-methylhistidine                                     | -7%           | 0.0078                | 0.0246                |
| 1-methylurate                                         | -17%          | 0.0044                | 0.0153                |
| 1-methylxanthine                                      | 8%            | 0.0120                | 0.0344                |
| 1-myristoyl-2-arachidonoyl-GPC (14:0/20:4)            | -15%          | 0.0020                | 0.0084                |
| 1-oleoyl-GPC (18:1)                                   | -12%          | 0.0002                | 0.0013                |
| 1-oleoyl-GPE (18:1)                                   | -21%          | 0.0017                | 0.0076                |
| 1-palmitoleoyl-2-linolenoyl-GPC (16:1/18:3)           | 65%           | 0.0014                | 0.0064                |
| 1-palmitoleoyl-GPC (16:1)                             | -26%          | <0.0001               | <0.0001               |
| 1-palmitoyl-2-arachidonoyl-GPI (16:0/20:4)            | -27%          | 0.0007                | 0.0034                |
| 1-palmitoyl-2-linoleoyl-GPE (16:0/18:2)               | -22%          | 0.0004                | 0.0022                |
| 1-palmitoyl-2-linoleoyl-GPI (16:0/18:2)               | -30%          | 0.0001                | 0.0008                |
| 1-palmitoyl-2-oleoyl-GPC (16:0/18:1)                  | -8%           | 0.0027                | 0.0103                |
| 1-palmitoyl-2-oleoyl-GPE (16:0/18:1)                  | -23%          | 0.0001                | 0.0008                |
| 1-palmitoyl-2-palmitoleoyl-GPC (16:0/16:1)            | -28%          | <0.0001               | 0.0003                |
| 1-palmitoyl-GPC (16:0)                                | -15%          | 0.0001                | 0.0009                |
| 1-palmitoyl-GPE (16:0)                                | -21%          | 0.0001                | 0.0008                |
| 1-ribosyl-imidazoleacetate                            | -23%          | 0.0007                | 0.0034                |
| 1-stearoyl-2-linoleoyl-GPE (18:0/18:2)                | -14%          | 0.0122                | 0.0346                |

|                                                         |      |         |         |
|---------------------------------------------------------|------|---------|---------|
| 1-stearoyl-2-linoleoyl-GPI (18:0/18:2)                  | -18% | 0.0003  | 0.0019  |
| 1-stearoyl-GPC (18:0)                                   | -13% | <0.0001 | 0.0004  |
| 1-stearoyl-GPE (18:0)                                   | -20% | <0.0001 | 0.0002  |
| 2,3-dihydroxy-5-methylthio-4-pentenoate (DMTPA)         | -7%  | <0.0001 | 0.0003  |
| 2,3-dihydroxyisovalerate                                | -39% | <0.0001 | 0.0003  |
| 21-hydroxypregnenolone disulfate                        | 12%  | 0.0168  | 0.0455  |
| 2-acetamidophenol sulfate                               | -35% | 0.0001  | 0.0006  |
| 2-aminoadipate                                          | 20%  | 0.0002  | 0.0011  |
| 2-aminobutyrate                                         | 75%  | <0.0001 | <0.0001 |
| 2-aminophenol sulfate                                   | -59% | <0.0001 | 0.0004  |
| 2-hydroxy-3-methylvalerate                              | 14%  | 0.0128  | 0.0362  |
| 2-hydroxybutyrate/2-hydroxyisobutyrate                  | 93%  | <0.0001 | <0.0001 |
| 2-hydroxyglutarate                                      | -20% | <0.0001 | <0.0001 |
| 2-linoleoylglycerol (18:2)                              | -31% | 0.0085  | 0.0263  |
| 2-methylbutyrylcarnitine (C5)                           | 40%  | <0.0001 | <0.0001 |
| 2-methylcitrate/homocitrate                             | 39%  | <0.0001 | 0.0001  |
| 2-oxoarginine                                           | -25% | <0.0001 | 0.0001  |
| 2-palmitoleoyl-GPC (16:1)                               | -23% | 0.0064  | 0.0209  |
| 3-(3-hydroxyphenyl)propionate                           | 31%  | 0.0063  | 0.0206  |
| 3-(4-hydroxyphenyl)lactate                              | -9%  | 0.0040  | 0.0144  |
| 3,7-dimethylurate                                       | 361% | 0.0106  | 0.0314  |
| 3-acetylphenol sulfate                                  | 600% | 0.0088  | 0.0271  |
| 3-aminoisobutyrate                                      | 25%  | 0.0007  | 0.0036  |
| 3-carboxy-4-methyl-5-pentyl-2-furanpropionate (3-CMPFP) | 50%  | <0.0001 | <0.0001 |
| 3-hydroxy-2-ethylpropionate                             | 63%  | <0.0001 | <0.0001 |
| 3-hydroxyadipate                                        | 180% | 0.0020  | 0.0082  |
| beta-hydroxybutyrate ( $\beta$ OHB)                     | 224% | <0.0001 | 0.0001  |
| 3-hydroxybutyrylglycine                                 | 125% | <0.0001 | 0.0002  |
| 3-hydroxybutyrylcarnitine (1)                           | 455% | <0.0001 | <0.0001 |
| 3-hydroxybutyrylcarnitine (2)                           | 73%  | <0.0001 | <0.0001 |
| 3-hydroxydecanoate                                      | 99%  | <0.0001 | <0.0001 |
| 3-hydroxyhexanoate                                      | 86%  | <0.0001 | <0.0001 |
| 3-hydroxyhippurate                                      | -36% | 0.0024  | 0.0098  |
| 3-hydroxyisobutyrate                                    | 60%  | 0.0002  | 0.0011  |
| 3-hydroxylaurate                                        | 95%  | <0.0001 | <0.0001 |
| 3-hydroxyoctanoate                                      | 81%  | <0.0001 | <0.0001 |
| 3-hydroxypyridine sulfate                               | -12% | 0.0037  | 0.0136  |
| 3-hydroxysebacate                                       | 234% | <0.0001 | <0.0001 |
| 3-methoxycatechol sulfate (2)                           | -31% | 0.0005  | 0.0029  |
| 3-methyl catechol sulfate (1)                           | 17%  | 0.0178  | 0.0474  |
| 3-methyl-2-oxobutyrate                                  | 19%  | 0.0004  | 0.0021  |
| 3-methyl-2-oxovalerate                                  | 17%  | 0.0016  | 0.0071  |
| 3-methylglutaconate                                     | 15%  | 0.0022  | 0.0092  |
| 3-methylhistidine                                       | -36% | 0.0004  | 0.0023  |
| 3-methylxanthine                                        | 271% | 0.0174  | 0.0463  |

|                                                    |      |         |         |
|----------------------------------------------------|------|---------|---------|
| 3-ureidopropionate                                 | 18%  | 0.0024  | 0.0096  |
| 4-acetylphenol sulfate                             | -44% | <0.0001 | 0.0004  |
| 4-allylphenol sulfate                              | -51% | 0.0026  | 0.0103  |
| 4-ethylphenylsulfate                               | -27% | 0.0057  | 0.0190  |
| 4-guanidinobutanoate                               | -33% | 0.0001  | 0.0005  |
| 4-hydroxyhippurate                                 | -27% | 0.0018  | 0.0076  |
| 4-hydroxyphenylpyruvate                            | -17% | <0.0001 | 0.0001  |
| 4-methoxyphenol sulfate                            | -73% | 0.0001  | 0.0008  |
| 4-methyl-2-oxopentanoate                           | 18%  | 0.0014  | 0.0065  |
| 4-methylhexanoylglutamine                          | 320% | <0.0001 | <0.0001 |
| 4-vinylphenol sulfate                              | -66% | 0.0050  | 0.0171  |
| 5-acetylamino-6-amino-3-methyluracil               | 13%  | 0.0026  | 0.0102  |
| 5alpha-androstan-3beta.17beta-diol disulfate       | -11% | 0.0004  | 0.0023  |
| 5alpha-androstan-3beta.17beta-diol monosulfate (2) | -10% | 0.0032  | 0.0122  |
| 5alpha-pregnan-3beta.20alpha-diol disulfate        | 30%  | 0.0030  | 0.0114  |
| 5alpha-pregnan-3beta.20alpha-diol monosulfate (2)  | 42%  | 0.0120  | 0.0344  |
| 5-dodecenoate (12:1n7)                             | 72%  | 0.0001  | 0.0004  |
| 5-dodecenoylcarnitine (C12:1)                      | 101% | 0.0001  | 0.0007  |
| 7-methylurate                                      | 188% | 0.0120  | 0.0344  |
| 7-methylxanthine                                   | 245% | 0.0086  | 0.0264  |
| acetoacetate                                       | 340% | <0.0001 | 0.0004  |
| acetylcarnitine (C2)                               | 54%  | <0.0001 | <0.0001 |
| acisoga                                            | 41%  | 0.0008  | 0.0039  |
| adipoylcarnitine (C6-DC)                           | 80%  | <0.0001 | 0.0001  |
| alanine                                            | -10% | 0.0173  | 0.0463  |
| alpha-hydroxyisocaproate                           | 19%  | 0.0030  | 0.0115  |
| alpha-hydroxyisovalerate                           | 16%  | 0.0043  | 0.0153  |
| alpha-ketobutyrate                                 | 177% | 0.0002  | 0.0012  |
| alpha-ketoglutamamate                              | -9%  | 0.0099  | 0.0294  |
| androstenediol (3beta.17beta) disulfate (1)        | -14% | <0.0001 | <0.0001 |
| androstenediol (3beta.17beta) monosulfate (2)      | -11% | <0.0001 | 0.0004  |
| arabitol/xylitol                                   | -21% | 0.0001  | 0.0006  |
| arabonate/xylonate                                 | -13% | 0.0050  | 0.0170  |
| argininate                                         | -15% | 0.0016  | 0.0071  |
| arginine                                           | -4%  | 0.0071  | 0.0226  |
| aspartate                                          | 15%  | 0.0069  | 0.0221  |
| behenoyl dihydrosphingomyelin (d18:0/22:0)         | 31%  | <0.0001 | 0.0002  |
| benzoylcarnitine                                   | 84%  | <0.0001 | 0.0001  |
| beta-hydroxyisovalerate                            | 42%  | <0.0001 | <0.0001 |
| betaine                                            | 8%   | 0.0007  | 0.0035  |
| caffeine                                           | 36%  | 0.0015  | 0.0069  |
| caproate (6:0)                                     | 20%  | 0.0025  | 0.0100  |
| carboxyethyl-GABA                                  | -18% | 0.0078  | 0.0245  |
| carotene diol (1)                                  | 27%  | 0.0046  | 0.0159  |
| ceramide (d18:1/17:0. d17:1/18:0)                  | 72%  | <0.0001 | <0.0001 |

|                                               |      |         |         |
|-----------------------------------------------|------|---------|---------|
| ceramide (d18:1/20:0. d16:1/22:0. d20:1/18:0) | -7%  | 0.0159  | 0.0433  |
| chenodeoxycholate                             | -22% | 0.0121  | 0.0346  |
| cis-4-decenoate (10:1n6)                      | 38%  | 0.0008  | 0.0038  |
| cis-4-decenoylcarnitine (C10:1)               | 43%  | 0.0182  | 0.0481  |
| citrate                                       | 28%  | 0.0003  | 0.0018  |
| creatine                                      | 10%  | 0.0095  | 0.0285  |
| decanoylcarnitine (C10)                       | 121% | <0.0001 | <0.0001 |
| diacylglycerol (14:0/18:1. 16:0/16:1) [1]     | -33% | 0.0045  | 0.0157  |
| diacylglycerol (14:0/18:1. 16:0/16:1) [2]     | -21% | 0.0145  | 0.0405  |
| diacylglycerol (16:1/18:2 [2]. 16:0/18:3 [1]) | -33% | 0.0007  | 0.0034  |
| dihomo-linolenoylcarnitine (C20:3n3 or 6)     | -10% | 0.0071  | 0.0226  |
| dihydroorotate                                | 8%   | 0.0079  | 0.0248  |
| dimethylglycine                               | 13%  | 0.0001  | 0.0009  |
| docosahexaenoylcarnitine (C22:6)              | 77%  | <0.0001 | <0.0001 |
| dodecadienoate (12:2)                         | 46%  | 0.0029  | 0.0112  |
| dodecenedioate (C12:1-DC)                     | 108% | <0.0001 | <0.0001 |
| dopamine 3-O-sulfate                          | -21% | 0.0011  | 0.0051  |
| dopamine 4-sulfate                            | -15% | 0.0052  | 0.0174  |
| eicosanedioate (C20-DC)                       | -36% | 0.0003  | 0.0018  |
| eicosapentaenoylcholine                       | 5%   | 0.0019  | 0.0081  |
| erythritol                                    | 944% | 0.0001  | 0.0006  |
| Fibrinopeptide A (7-16)                       | 39%  | 0.0130  | 0.0366  |
| galactonate                                   | 47%  | 0.0073  | 0.0232  |
| gamma-CEHC                                    | -29% | 0.0001  | 0.0004  |
| gamma-glutamyl-2-aminobutyrate                | 109% | <0.0001 | <0.0001 |
| gamma-glutamylglycine                         | -10% | 0.0067  | 0.0216  |
| gamma-glutamylhistidine                       | -9%  | 0.0013  | 0.0059  |
| gamma-glutamylleucine                         | 11%  | 0.0148  | 0.0407  |
| gamma-glutamylthreonine                       | -11% | 0.0158  | 0.0430  |
| gamma-glutamyltryptophan                      | -9%  | 0.0016  | 0.0072  |
| gamma-glutamyltyrosine                        | -11% | 0.0042  | 0.0149  |
| gamma-glutamylvaline                          | 18%  | 0.0114  | 0.0332  |
| gamma-tocopherol/beta-tocopherol              | -48% | <0.0001 | <0.0001 |
| glucose                                       | -2%  | 0.0189  | 0.0493  |
| glutamine                                     | -4%  | 0.0134  | 0.0374  |
| glycerol                                      | 45%  | 0.0003  | 0.0018  |
| glycerol 3-phosphate                          | -7%  | 0.0038  | 0.0141  |
| glycerophosphorylcholine (GPC)                | -14% | 0.0007  | 0.0035  |
| glycine                                       | -7%  | 0.0066  | 0.0214  |
| glycine conjugate of C10H14O2 (1)             | -64% | <0.0001 | 0.0004  |
| glyco-beta-muricholate                        | 207% | 0.0039  | 0.0141  |
| glycosyl ceramide (d18:1/23:1. d17:1/24:1)    | 31%  | 0.0001  | 0.0004  |
| glycosyl ceramide (d18:2/24:1. d18:1/24:2)    | 10%  | 0.0049  | 0.0168  |
| glycosyl-N-nervonoyl-sphingosine (d18:1/24:1) | 17%  | 0.0189  | 0.0493  |
| glycosyl-N-palmitoyl-sphingosine (d18:1/16:0) | 21%  | <0.0001 | 0.0001  |

|                                                    |      |         |         |
|----------------------------------------------------|------|---------|---------|
| glycosyl-N-stearoyl-sphingosine (d18:1/18:0)       | 11%  | 0.0020  | 0.0082  |
| glycosyl-N-tricosanoyl-sphingadienine (d18:2/23:0) | 30%  | <0.0001 | <0.0001 |
| guaiacol sulfate                                   | -14% | 0.0116  | 0.0339  |
| guanidinoacetate                                   | -11% | 0.0002  | 0.0011  |
| guanidinosuccinate                                 | 34%  | <0.0001 | <0.0001 |
| heptenedioate (C7:1-DC)                            | 206% | <0.0001 | 0.0003  |
| hexadecanedioate (C16-DC)                          | 30%  | 0.0004  | 0.0023  |
| hexanoylcarnitine (C6)                             | 75%  | <0.0001 | <0.0001 |
| hexanoylglutamine                                  | 154% | <0.0001 | 0.0001  |
| hexanoylglycine                                    | 125% | 0.0146  | 0.0405  |
| homoarginine                                       | 16%  | 0.0005  | 0.0025  |
| hydroxypalmitoyl sphingomyelin (d18:1/16:0(OH))    | 9%   | 0.0091  | 0.0277  |
| indole-3-carboxylate                               | 36%  | 0.0017  | 0.0074  |
| indoleacetate                                      | 20%  | 0.0045  | 0.0158  |
| indoleacetylcarnitine                              | 62%  | 0.0001  | 0.0009  |
| isoleucine                                         | 7%   | 0.0053  | 0.0175  |
| isovalerylcarnitine (C5)                           | 28%  | 0.0006  | 0.0031  |
| lactate                                            | -13% | 0.0019  | 0.0081  |
| laurylcarnitine (C12)                              | 118% | <0.0001 | <0.0001 |
| leucine                                            | 7%   | 0.0092  | 0.0278  |
| linolenoylcarnitine (C18:3)                        | -22% | 0.0009  | 0.0042  |
| linoleoyl-arachidonoyl-glycerol (18:2/20:4) [2]    | -24% | 0.0168  | 0.0455  |
| linoleoyl-linolenoyl-glycerol (18:2/18:3) [1]      | -52% | 0.0007  | 0.0035  |
| linoleoyl-linoleoyl-glycerol (18:2/18:2) [1]       | -13% | 0.0062  | 0.0205  |
| malate                                             | 10%  | 0.0131  | 0.0370  |
| mannitol/sorbitol                                  | -26% | 0.0182  | 0.0481  |
| mannose                                            | 26%  | <0.0001 | <0.0001 |
| margaroylcarnitine (C17)                           | 65%  | <0.0001 | <0.0001 |
| methionine                                         | -7%  | 0.0052  | 0.0174  |
| myristoleoylcarnitine (C14:1)                      | 120% | <0.0001 | <0.0001 |
| myristoyl dihydrosphingomyelin (d18:0/14:0)        | 54%  | <0.0001 | <0.0001 |
| myristoylcarnitine (C14)                           | 68%  | <0.0001 | <0.0001 |
| myristoylcholine                                   | -21% | 0.0002  | 0.0011  |
| N1-methylinosine                                   | 10%  | 0.0085  | 0.0263  |
| N6.N6-dimethyllysine                               | -5%  | 0.0172  | 0.0462  |
| N-acetyl-3-methylhistidine                         | -35% | 0.0001  | 0.0008  |
| N-acetylglycine                                    | 70%  | <0.0001 | 0.0001  |
| N-acetylmethionine                                 | -12% | <0.0001 | 0.0001  |
| N-acetylphenylalanine                              | -10% | 0.0007  | 0.0034  |
| N-acetylproline                                    | -16% | 0.0042  | 0.0149  |
| N-acetylputrescine                                 | -7%  | 0.0111  | 0.0327  |
| N-acetyltaurine                                    | -7%  | 0.0154  | 0.0422  |
| N-acetyltryptophan                                 | -22% | <0.0001 | 0.0002  |
| N-acetyltyrosine                                   | -15% | 0.0007  | 0.0036  |
| N-behenoyl-sphingadienine (d18:2/22:0)             | -11% | 0.0019  | 0.0080  |

|                                                    |      |         |         |
|----------------------------------------------------|------|---------|---------|
| nonanoylcarnitine (C9)                             | 125% | <0.0001 | <0.0001 |
| N-stearoyl-sphingadienine (d18:2/18:0)             | 441% | 0.0004  | 0.0021  |
| N-stearoyl-sphinganine (d18:0/18:0)                | 135% | <0.0001 | 0.0003  |
| N-stearoyl-sphingosine (d18:1/18:0)                | 31%  | 0.0001  | 0.0004  |
| octadecadienedioate (C18:2-DC)                     | 127% | 0.0007  | 0.0036  |
| octadecanedioate (C18-DC)                          | 99%  | <0.0001 | <0.0001 |
| octadecanedioylcarnitine (C18-DC)                  | 81%  | <0.0001 | <0.0001 |
| octadecenedioylcarnitine (C18:1-DC)                | 55%  | <0.0001 | 0.0003  |
| octanoylcarnitine (C8)                             | 110% | <0.0001 | 0.0002  |
| oleate/vaccenate (18:1)                            | 34%  | 0.0036  | 0.0136  |
| oleoylcarnitine (C18:1)                            | 22%  | 0.0004  | 0.0021  |
| oleoylcholine                                      | -11% | 0.0041  | 0.0147  |
| orotidine                                          | -19% | 0.0048  | 0.0166  |
| palmitoleate (16:1n7)                              | 19%  | 0.0091  | 0.0277  |
| palmitoleoylcarnitine (C16:1)                      | 48%  | <0.0001 | <0.0001 |
| palmitoleoyl-linoleoyl-glycerol (16:1/18:2) [1]    | -29% | 0.0008  | 0.0039  |
| palmitoleoylcholine                                | -23% | 0.0001  | 0.0008  |
| palmitoyl dihydrosphingomyelin (d18:0/16:0)        | 25%  | <0.0001 | <0.0001 |
| palmitoyl sphingomyelin (d18:1/16:0)               | 9%   | <0.0001 | 0.0002  |
| palmitoyl-arachidonoyl-glycerol (16:0/20:4) [1]    | -11% | 0.0133  | 0.0374  |
| palmitoylcarnitine (C16)                           | 16%  | 0.0016  | 0.0071  |
| pantothenate                                       | 11%  | 0.0008  | 0.0039  |
| paraxanthine                                       | -15% | 0.0002  | 0.0010  |
| phenylacetylcarnitine                              | 73%  | 0.0030  | 0.0114  |
| phenyllactate (PLA)                                | -7%  | 0.0019  | 0.0080  |
| phytanate                                          | 194% | <0.0001 | <0.0001 |
| picolinate                                         | 24%  | 0.0003  | 0.0017  |
| pipecolate                                         | 30%  | 0.0110  | 0.0324  |
| pregnenediol-3-glucuronide                         | 53%  | 0.0025  | 0.0100  |
| pristanate                                         | 634% | <0.0001 | 0.0003  |
| pro-hydroxy-pro                                    | 15%  | 0.0051  | 0.0172  |
| proline                                            | -14% | <0.0001 | 0.0001  |
| propionylcarnitine (C3)                            | 20%  | 0.0023  | 0.0095  |
| pyrraline                                          | -50% | <0.0001 | <0.0001 |
| pyruvate                                           | -23% | 0.0002  | 0.0013  |
| ribitol                                            | -13% | 0.0003  | 0.0019  |
| ribonate                                           | -10% | 0.0032  | 0.0119  |
| serine                                             | 11%  | 0.0009  | 0.0043  |
| S-methylcysteine                                   | 113% | <0.0001 | <0.0001 |
| S-methylcysteine sulfoxide                         | 228% | <0.0001 | <0.0001 |
| S-methylmethionine                                 | 384% | 0.0028  | 0.0107  |
| sphingomyelin (d17:1/14:0. d16:1/15:0)             | 17%  | 0.0037  | 0.0136  |
| sphingomyelin (d17:1/16:0. d18:1/15:0. d16:1/17:0) | 16%  | <0.0001 | <0.0001 |
| sphingomyelin (d17:2/16:0. d18:2/15:0)             | 13%  | 0.0014  | 0.0065  |
| sphingomyelin (d18:0/18:0. d19:0/17:0)             | 98%  | <0.0001 | <0.0001 |

|                                                                |      |         |         |
|----------------------------------------------------------------|------|---------|---------|
| sphingomyelin (d18:0/20:0. d16:0/22:0)                         | 51%  | <0.0001 | <0.0001 |
| sphingomyelin (d18:1/14:0. d16:1/16:0)                         | 15%  | <0.0001 | 0.0002  |
| sphingomyelin (d18:1/17:0. d17:1/18:0. d19:1/16:0)             | 32%  | <0.0001 | <0.0001 |
| sphingomyelin (d18:1/18:1. d18:2/18:0)                         | 26%  | <0.0001 | <0.0001 |
| sphingomyelin (d18:1/19:0. d19:1/18:0)                         | 22%  | 0.0007  | 0.0035  |
| sphingomyelin (d18:1/20:1. d18:2/20:0)                         | 10%  | 0.0051  | 0.0172  |
| sphingomyelin (d18:1/20:2. d18:2/20:1. d16:1/22:2)             | 30%  | 0.0003  | 0.0018  |
| sphingomyelin (d18:1/21:0. d17:1/22:0. d16:1/23:0)             | 14%  | <0.0001 | 0.0003  |
| sphingomyelin (d18:1/22:2. d18:2/22:1. d16:1/24:2)             | 26%  | <0.0001 | 0.0002  |
| sphingomyelin (d18:1/25:0. d19:0/24:1. d20:1/23:0. d19:1/24:0) | 36%  | <0.0001 | <0.0001 |
| sphingomyelin (d18:2/16:0. d18:1/16:1)                         | 7%   | 0.0062  | 0.0204  |
| sphingomyelin (d18:2/18:1)                                     | 51%  | <0.0001 | <0.0001 |
| sphingomyelin (d18:2/21:0. d16:2/23:0)                         | 30%  | <0.0001 | <0.0001 |
| sphingomyelin (d18:2/23:0. d18:1/23:1. d17:1/24:1)             | 19%  | <0.0001 | <0.0001 |
| sphingomyelin (d18:2/23:1)                                     | 30%  | <0.0001 | <0.0001 |
| sphingomyelin (d18:2/24:2)                                     | 13%  | 0.0026  | 0.0102  |
| stearoyl sphingomyelin (d18:1/18:0)                            | 33%  | <0.0001 | <0.0001 |
| stearoylcarnitine (C18)                                        | 50%  | <0.0001 | <0.0001 |
| suberoylcarnitine (C8-DC)                                      | 220% | 0.0021  | 0.0085  |
| succinylcarnitine (C4-DC)                                      | -16% | 0.0001  | 0.0004  |
| tetradecadienoate (14:2)                                       | 58%  | 0.0001  | 0.0006  |
| theobromine                                                    | 484% | 0.0150  | 0.0413  |
| theophylline                                                   | 32%  | 0.0002  | 0.0010  |
| threonine                                                      | -13% | <0.0001 | 0.0003  |
| tiglylcarnitine (C5:1-DC)                                      | 54%  | <0.0001 | <0.0001 |
| tricosanoyl sphingomyelin (d18:1/23:0)                         | 19%  | <0.0001 | <0.0001 |
| trimethylamine N-oxide                                         | 71%  | 0.0001  | 0.0004  |
| tryptophan                                                     | -5%  | 0.0065  | 0.0213  |
| tyrosine                                                       | -11% | <0.0001 | 0.0002  |
| urea                                                           | 19%  | 0.0003  | 0.0018  |
| uridine                                                        | 23%  | <0.0001 | 0.0001  |
| ursodeoxycholate                                               | -9%  | 0.0067  | 0.0216  |
| valine                                                         | 7%   | 0.0082  | 0.0257  |
| vanillactate                                                   | -8%  | 0.0113  | 0.0332  |
| xanthine                                                       | 23%  | 0.0185  | 0.0486  |



**ESM Table 4.** Metabolites significantly changed in evening samples after 5 d high-fat diet.

|                                                        | <b>change</b> | <b>p value</b> | <b>q value</b> |
|--------------------------------------------------------|---------------|----------------|----------------|
| (N(1) + N(8))-acetylsermidine                          | -8%           | 0.0081         | 0.0206         |
| 1-(1-enyl-oleoyl)-GPE (P-18:1)                         | 26%           | 0.0142         | 0.0339         |
| 1-(1-enyl-palmitoyl)-2-arachidonoyl-GPE (P-16:0/20:4)  | 34%           | 0.0002         | 0.0011         |
| 1-(1-enyl-palmitoyl)-2-oleoyl-GPE (P-16:0/18:1)        | 24%           | 0.0190         | 0.0430         |
| 1-(1-enyl-palmitoyl)-2-palmitoyl-GPC (P-16:0/16:0)     | 6%            | 0.0110         | 0.0271         |
| 1-(1-enyl-palmitoyl)-GPC (P-16:0)                      | -16%          | 0.0001         | 0.0003         |
| 1-(1-enyl-stearoyl)-2-arachidonoyl-GPE (P-18:0/20:4)   | 50%           | <0.0001        | <0.0001        |
| 1-(1-enyl-stearoyl)-2-linoleoyl-GPE (P-18:0/18:2)      | 30%           | 0.0002         | 0.0008         |
| 1-(1-enyl-stearoyl)-2-oleoyl-GPE (P-18:0/18:1)         | 33%           | 0.0001         | 0.0006         |
| 1,2-dilinoleoyl-GPC (18:2/18:2)                        | -11%          | 0.0049         | 0.0139         |
| 1,2-dipalmitoyl-GPC (16:0/16:0)                        | 11%           | 0.0002         | 0.0007         |
| 1,5-anhydroglucitol (1,5-AG)                           | -3%           | 0.0044         | 0.0127         |
| 10-nonadecenoate (19:1n9)                              | 49%           | <0.0001        | 0.0002         |
| 10-undecenoate (11:1n1)                                | 51%           | 0.0012         | 0.0042         |
| 12,13-DiHOME                                           | 831%          | <0.0001        | <0.0001        |
| 13-HODE + 9-HODE                                       | 149%          | <0.0001        | 0.0001         |
| 1-arachidonoyl-GPC (20:4n6)                            | 8%            | 0.0002         | 0.0011         |
| 1-arachidonoyl-GPE (20:4n6)                            | 17%           | 0.0003         | 0.0012         |
| 1-arachidonoylglycerol (20:4)                          | 84%           | 0.0009         | 0.0031         |
| 1-docosahexaenoylglycerol (22:6)                       | 133%          | 0.0002         | 0.0007         |
| 1-lignoceroyl-GPC (24:0)                               | -30%          | <0.0001        | <0.0001        |
| 1-linolenoyl-GPC (18:3)                                | -22%          | 0.0010         | 0.0036         |
| 1-linoleoyl-2-linolenoyl-GPC (18:2/18:3)               | -33%          | 0.0002         | 0.0011         |
| 1-methylhistidine                                      | -14%          | 0.0009         | 0.0033         |
| 1-methylnicotinamide                                   | 74%           | 0.0047         | 0.0136         |
| 1-myristoyl-2-arachidonoyl-GPC (14:0/20:4)             | 29%           | 0.0100         | 0.0249         |
| 1-myristoyl-2-palmitoyl-GPC (14:0/16:0)                | 54%           | 0.0036         | 0.0107         |
| 1-palmitoleoyl-2-linolenoyl-GPC (16:1/18:3)            | -17%          | 0.0017         | 0.0055         |
| 1-palmitoleoyl-GPC (16:1)                              | -18%          | 0.0001         | 0.0005         |
| 1-palmitoyl-2-arachidonoyl-GPC (16:0/20:4n6)           | 9%            | 0.0062         | 0.0167         |
| 1-palmitoyl-2-arachidonoyl-GPI (16:0/20:4)             | -12%          | 0.0183         | 0.0419         |
| 1-palmitoyl-2-dihomo-linolenoyl-GPC (16:0/20:3n3 or 6) | -5%           | 0.0051         | 0.0143         |
| 1-palmitoyl-2-docosahexaenoyl-GPC (16:0/22:6)          | 9%            | 0.0021         | 0.0067         |
| 1-palmitoyl-2-linoleoyl-GPI (16:0/18:2)                | -23%          | <0.0001        | 0.0003         |
| 1-palmitoyl-2-palmitoleoyl-GPC (16:0/16:1)             | -15%          | 0.0015         | 0.0052         |
| 1-palmitoyl-GPC (16:0)                                 | -7%           | 0.0042         | 0.0123         |
| 1-palmitoyl-GPE (16:0)                                 | -15%          | 0.0001         | 0.0007         |
| 1-stearoyl-2-arachidonoyl-GPC (18:0/20:4)              | 10%           | 0.0017         | 0.0056         |
| 1-stearoyl-2-arachidonoyl-GPE (18:0/20:4)              | 19%           | 0.0191         | 0.0430         |
| 1-stearoyl-2-linoleoyl-GPC (18:0/18:2)                 | 7%            | 0.0139         | 0.0333         |
| 1-stearoyl-2-oleoyl-GPI (18:0/18:1)                    | 25%           | 0.0132         | 0.0317         |
| 1-stearoyl-GPC (18:0)                                  | -4%           | 0.0213         | 0.0469         |

|                                                         |       |         |         |
|---------------------------------------------------------|-------|---------|---------|
| 1-stearoyl-GPE (18:0)                                   | -12%  | 0.0003  | 0.0014  |
| 2,3-dihydroxy-5-methylthio-4-pentenoate (DMTPA)         | 12%   | 0.0171  | 0.0400  |
| 2,3-dihydroxyisovalerate                                | -84%  | 0.0001  | 0.0005  |
| 2-aminoadipate                                          | 50%   | 0.0003  | 0.0012  |
| 2-aminobutyrate                                         | 104%  | <0.0001 | <0.0001 |
| 2-aminophenol sulfate                                   | -55%  | 0.0035  | 0.0105  |
| 2-hydroxy-3-methylvalerate                              | 50%   | <0.0001 | 0.0002  |
| 2-hydroxybutyrate/2-hydroxyisobutyrate                  | 135%  | <0.0001 | <0.0001 |
| 2-hydroxyglutarate                                      | -18%  | <0.0001 | <0.0001 |
| 2-hydroxyhippurate (salicylurate)                       | -51%  | 0.0050  | 0.0142  |
| 2-hydroxynervonate                                      | 31%   | 0.0004  | 0.0017  |
| 2-keto-3-deoxy-gluconate                                | 30%   | 0.0045  | 0.0130  |
| 2-linoleoylglycerol (18:2)                              | -37%  | 0.0011  | 0.0038  |
| 2-methylbutyrylcarnitine (C5)                           | 71%   | <0.0001 | <0.0001 |
| 2-methylcitrate/homocitrate                             | 30%   | <0.0001 | 0.0001  |
| 2-oxoarginine                                           | 28%   | 0.0058  | 0.0160  |
| 3-(3-hydroxyphenyl)propionate                           | -53%  | 0.0063  | 0.0170  |
| 3-(4-hydroxyphenyl)lactate                              | 28%   | <0.0001 | <0.0001 |
| 3,4-methyleneheptanoate                                 | 3%    | 0.0012  | 0.0042  |
| 3-acetylphenol sulfate                                  | -38%  | 0.0053  | 0.0146  |
| 3-carboxy-4-methyl-5-pentyl-2-furanpropionate (3-CMPFP) | 58%   | <0.0001 | <0.0001 |
| 3-ethylphenylsulfate                                    | 1062% | <0.0001 | <0.0001 |
| 3-formylindole                                          | -7%   | 0.0179  | 0.0411  |
| 3-hydroxy-2-ethylpropionate                             | 118%  | <0.0001 | <0.0001 |
| 3-hydroxy-3-methylglutarate                             | -19%  | 0.0094  | 0.0237  |
| 3-hydroxyadipate                                        | 202%  | 0.0001  | 0.0006  |
| beta-hydroxybutyrate ( $\beta$ OHB)                     | 522%  | <0.0001 | <0.0001 |
| 3-hydroxybutyrylglycine                                 | 366%  | <0.0001 | <0.0001 |
| 3-hydroxybutyrylcarnitine (1)                           | 569%  | <0.0001 | <0.0001 |
| 3-hydroxybutyrylcarnitine (2)                           | 107%  | <0.0001 | <0.0001 |
| 3-hydroxydecanoate                                      | 134%  | <0.0001 | <0.0001 |
| 3-hydroxyhexanoate                                      | 148%  | <0.0001 | <0.0001 |
| 3-hydroxyhippurate                                      | -54%  | 0.0024  | 0.0077  |
| 3-hydroxyisobutyrate                                    | 120%  | <0.0001 | <0.0001 |
| 3-hydroxylaurate                                        | 142%  | <0.0001 | <0.0001 |
| 3-hydroxyoctanoate                                      | 97%   | <0.0001 | <0.0001 |
| 3-hydroxyoleate                                         | 340%  | <0.0001 | <0.0001 |
| 3-hydroxypyridine sulfate                               | -33%  | 0.0114  | 0.0279  |
| 3-hydroxysebacate                                       | 470%  | <0.0001 | <0.0001 |
| 3-methoxycatechol sulfate (2)                           | -53%  | 0.0001  | 0.0004  |
| 3-methoxytyramine sulfate                               | -31%  | 0.0004  | 0.0018  |
| 3-methoxytyrosine                                       | -12%  | 0.0044  | 0.0127  |
| 3-methyl catechol sulfate (1)                           | 4%    | 0.0162  | 0.0380  |
| 3-methyl-2-oxobutyrate                                  | 35%   | <0.0001 | <0.0001 |
| 3-methyl-2-oxovalerate                                  | 24%   | 0.0001  | 0.0004  |

|                                                     |      |         |         |
|-----------------------------------------------------|------|---------|---------|
| 3-methylglutaconate                                 | 66%  | <0.0001 | <0.0001 |
| 3-ureidopropionate                                  | -8%  | 0.0117  | 0.0285  |
| 4-acetylphenol sulfate                              | -65% | <0.0001 | <0.0001 |
| 4-allylphenol sulfate                               | -54% | 0.0070  | 0.0183  |
| 4-cholesten-3-one                                   | -15% | 0.0042  | 0.0123  |
| 4-guanidinobutanoate                                | -15% | 0.0176  | 0.0406  |
| 4-hydroxyhippurate                                  | -42% | <0.0001 | 0.0002  |
| 4-methoxyphenol sulfate                             | -80% | 0.0007  | 0.0025  |
| 4-methyl-2-oxopentanoate                            | 25%  | <0.0001 | 0.0001  |
| 4-methylguaiaicol sulfate                           | 40%  | 0.0089  | 0.0225  |
| 4-methylhexanoylglutamine                           | 459% | <0.0001 | <0.0001 |
| 4-vinylphenol sulfate                               | -71% | 0.0001  | 0.0007  |
| 5-(galactosylhydroxy)-L-lysine                      | -10% | 0.0070  | 0.0183  |
| 5.6-dihydrouridine                                  | -8%  | 0.0002  | 0.0007  |
| 5-acetylamino-6-amino-3-methyluracil                | -9%  | 0.0190  | 0.0430  |
| 5alpha-androstan-3alpha.17beta-diol monosulfate (2) | 17%  | 0.0172  | 0.0401  |
| 5alpha-androstan-3beta.17beta-diol disulfate        | -13% | 0.0011  | 0.0038  |
| 5alpha-pregnan-3beta.20alpha-diol monosulfate (2)   | 65%  | 0.0068  | 0.0182  |
| 5-dodecenoate (12:1n7)                              | 574% | <0.0001 | <0.0001 |
| 5-dodecenoylcarnitine (C12:1)                       | 109% | 0.0078  | 0.0201  |
| 5-hydroxyhexanoate                                  | 100% | 0.0014  | 0.0048  |
| 6-bromotryptophan                                   | -8%  | 0.0080  | 0.0205  |
| 6-oxopiperidine-2-carboxylate                       | 29%  | 0.0203  | 0.0453  |
| 9-hydroxystearate                                   | 136% | <0.0001 | 0.0001  |
| acetoacetate                                        | 376% | <0.0001 | 0.0001  |
| acetylcarnitine (C2)                                | 59%  | <0.0001 | <0.0001 |
| adenosine                                           | 103% | 0.0052  | 0.0144  |
| adipate (C6-DC)                                     | 416% | <0.0001 | 0.0002  |
| adipoylcarnitine (C6-DC)                            | 187% | <0.0001 | <0.0001 |
| allantoin                                           | -20% | 0.0038  | 0.0114  |
| alliin                                              | -60% | 0.0001  | 0.0003  |
| alpha-hydroxycaproate                               | 165% | 0.0053  | 0.0146  |
| alpha-hydroxyisocaproate                            | 36%  | 0.0004  | 0.0017  |
| alpha-hydroxyisovalerate                            | 31%  | 0.0006  | 0.0024  |
| alpha-ketobutyrate                                  | 262% | <0.0001 | 0.0002  |
| androstenediol (3beta.17beta) disulfate (1)         | -14% | <0.0001 | 0.0001  |
| androstenediol (3beta.17beta) monosulfate (2)       | -14% | <0.0001 | 0.0001  |
| arabinose                                           | 102% | 0.0005  | 0.0020  |
| arabitol/xylitol                                    | -27% | <0.0001 | <0.0001 |
| arabonate/xylonate                                  | -26% | 0.0006  | 0.0024  |
| arachidonoylcarnitine (C20:4)                       | -9%  | 0.0059  | 0.0160  |
| argininate                                          | 39%  | <0.0001 | 0.0002  |
| behenoyl dihydrosphingomyelin (d18:0/22:0)          | 46%  | <0.0001 | <0.0001 |
| benzoylcarnitine                                    | 60%  | 0.0019  | 0.0060  |
| beta-alanine                                        | 79%  | 0.0004  | 0.0018  |

|                                               |       |         |         |
|-----------------------------------------------|-------|---------|---------|
| beta-citrylglutamate                          | 22%   | 0.0004  | 0.0017  |
| beta-hydroxyisovalerate                       | 83%   | <0.0001 | <0.0001 |
| caprate (10:0)                                | 636%  | <0.0001 | <0.0001 |
| caproate (6:0)                                | 56%   | 0.0002  | 0.0007  |
| caprylate (8:0)                               | 719%  | <0.0001 | 0.0001  |
| carboxyethyl-GABA                             | -12%  | 0.0053  | 0.0146  |
| carotene diol (1)                             | 41%   | <0.0001 | 0.0001  |
| carotene diol (2)                             | 35%   | 0.0031  | 0.0095  |
| carotene diol (3)                             | 33%   | 0.0068  | 0.0182  |
| ceramide (d16:1/24:1. d18:1/22:1)             | 19%   | 0.0210  | 0.0466  |
| ceramide (d18:1/14:0. d16:1/16:0)             | 32%   | <0.0001 | <0.0001 |
| ceramide (d18:1/17:0. d17:1/18:0)             | 99%   | <0.0001 | <0.0001 |
| chenodeoxycholate                             | 185%  | 0.0008  | 0.0030  |
| cholate                                       | 994%  | 0.0017  | 0.0055  |
| choline phosphate                             | 37%   | 0.0001  | 0.0005  |
| cis-4-decenoate (10:1n6)                      | 103%  | 0.0069  | 0.0183  |
| citrulline                                    | -10%  | 0.0017  | 0.0055  |
| cystathionine                                 | 72%   | 0.0019  | 0.0061  |
| decanoylcarnitine (C10)                       | 186%  | <0.0001 | <0.0001 |
| diacylglycerol (16:1/18:2 [2]. 16:0/18:3 [1]) | -26%  | 0.0003  | 0.0012  |
| dihomo-linolenoylcarnitine (C20:3n3 or 6)     | -15%  | <0.0001 | 0.0003  |
| dihomo-linolenoyl-choline                     | -13%  | 0.0044  | 0.0127  |
| dihomo-linoleoylcarnitine (C20:2)             | -10%  | 0.0034  | 0.0103  |
| dimethyl sulfone                              | -12%  | 0.0074  | 0.0194  |
| dimethylglycine                               | 36%   | <0.0001 | <0.0001 |
| docosahexaenoate (DHA; 22:6n3)                | 43%   | 0.0004  | 0.0018  |
| docosahexaenoylcarnitine (C22:6)              | 32%   | 0.0078  | 0.0201  |
| docosapentaenoate (n6 DPA; 22:5n6)            | 50%   | <0.0001 | 0.0002  |
| dodecadienoate (12:2)                         | 125%  | <0.0001 | 0.0001  |
| dodecanedioate (C12-DC)                       | 1384% | <0.0001 | 0.0001  |
| dodecenedioate (C12:1-DC)                     | 210%  | <0.0001 | 0.0001  |
| eicosanedioate (C20-DC)                       | -33%  | 0.0001  | 0.0006  |
| eicosapentaenoylcholine                       | -11%  | 0.0027  | 0.0084  |
| erythritol                                    | 1943% | 0.0009  | 0.0032  |
| ethylmalonate                                 | 28%   | 0.0038  | 0.0114  |
| eugenol sulfate                               | -70%  | 0.0051  | 0.0144  |
| Fibrinopeptide A. des-ala(1)                  | 10%   | 0.0029  | 0.0089  |
| Fibrinopeptide B (1-13)                       | 9%    | 0.0077  | 0.0200  |
| formiminoglutamate                            | 93%   | 0.0003  | 0.0013  |
| fructose                                      | -28%  | 0.0077  | 0.0200  |
| gamma-CEHC                                    | -37%  | <0.0001 | 0.0001  |
| gamma-glutamyl-2-aminobutyrate                | 153%  | <0.0001 | <0.0001 |
| gamma-glutamylglutamate                       | 23%   | 0.0046  | 0.0131  |
| gamma-glutamylglycine                         | -17%  | <0.0001 | 0.0001  |
| gamma-glutamylhistidine                       | -7%   | 0.0112  | 0.0276  |

|                                                     |      |         |         |
|-----------------------------------------------------|------|---------|---------|
| gamma-glutamylisoleucine                            | 35%  | <0.0001 | <0.0001 |
| gamma-glutamylleucine                               | 39%  | <0.0001 | <0.0001 |
| gamma-glutamyltryptophan                            | 19%  | 0.0026  | 0.0081  |
| gamma-glutamyltyrosine                              | 25%  | 0.0099  | 0.0247  |
| gamma-glutamylvaline                                | 55%  | <0.0001 | <0.0001 |
| gamma-tocopherol/beta-tocopherol                    | -45% | <0.0001 | <0.0001 |
| gentisate                                           | -50% | <0.0001 | <0.0001 |
| gluconate                                           | -22% | 0.0076  | 0.0198  |
| glutaryl carnitine (C5-DC)                          | 8%   | 0.0012  | 0.0041  |
| glycerol                                            | 98%  | <0.0001 | <0.0001 |
| glycerophosphoinositol                              | -21% | 0.0048  | 0.0137  |
| glycerophosphorylcholine (GPC)                      | -11% | 0.0004  | 0.0016  |
| glycine                                             | -13% | 0.0001  | 0.0003  |
| glycine conjugate of C10H14O2 (1)                   | -76% | <0.0001 | <0.0001 |
| glyco-beta-muricholate                              | 124% | <0.0001 | 0.0001  |
| glycochenodeoxycholate 3-sulfate                    | 77%  | 0.0001  | 0.0003  |
| glycodeoxycholate 3-sulfate                         | 75%  | 0.0006  | 0.0022  |
| glycosyl ceramide (d18:1/23:1. d17:1/24:1)          | 35%  | <0.0001 | <0.0001 |
| glycosyl ceramide (d18:2/24:1. d18:1/24:2)          | 14%  | 0.0001  | 0.0003  |
| glycosyl-N-palmitoyl-sphingosine (d18:1/16:0)       | 16%  | 0.0002  | 0.0008  |
| glycosyl-N-stearoyl-sphingosine (d18:1/18:0)        | 18%  | <0.0001 | 0.0002  |
| glycosyl-N-tricosanoyl-sphingadinenine (d18:2/23:0) | 42%  | <0.0001 | <0.0001 |
| guaiaicol sulfate                                   | -38% | 0.0026  | 0.0081  |
| guanidinoacetate                                    | -20% | 0.0006  | 0.0022  |
| guanidinosuccinate                                  | 31%  | <0.0001 | <0.0001 |
| heptenedioate (C7:1-DC)                             | 118% | 0.0211  | 0.0467  |
| hexadecanedioate (C16-DC)                           | 83%  | 0.0001  | 0.0003  |
| hexanoyl carnitine (C6)                             | 118% | <0.0001 | <0.0001 |
| hexanoylglutamine                                   | 410% | <0.0001 | <0.0001 |
| hexanoylglycine                                     | 332% | <0.0001 | <0.0001 |
| hippurate                                           | -23% | 0.0071  | 0.0188  |
| hydantoin-5-propionate                              | 138% | <0.0001 | 0.0002  |
| hydroquinone sulfate                                | -30% | 0.0117  | 0.0285  |
| hydroxyasparagine                                   | -9%  | <0.0001 | 0.0001  |
| hyocholate                                          | 245% | 0.0003  | 0.0013  |
| indoleacetylcarnitine                               | 39%  | <0.0001 | 0.0002  |
| indolepropionate                                    | -37% | 0.0014  | 0.0047  |
| isobutyrylcarnitine (C4)                            | 76%  | <0.0001 | 0.0001  |
| isocitrate                                          | -20% | 0.0002  | 0.0010  |
| isoleucine                                          | 22%  | <0.0001 | 0.0001  |
| isovalerylcarnitine (C5)                            | 55%  | 0.0002  | 0.0008  |
| kynurenate                                          | 16%  | 0.0005  | 0.0020  |
| lactate                                             | -20% | 0.0001  | 0.0005  |
| lactosyl-N-behenoyl-sphingosine (d18:1/22:0)        | 13%  | 0.0006  | 0.0021  |
| lactosyl-N-nervonoyl-sphingosine (d18:1/24:1)       | 9%   | 0.0136  | 0.0325  |

|                                                 |       |         |         |
|-------------------------------------------------|-------|---------|---------|
| lanthionine                                     | -24%  | 0.0093  | 0.0235  |
| laurate (12:0)                                  | 678%  | <0.0001 | <0.0001 |
| laurylcarnitine (C12)                           | 248%  | <0.0001 | <0.0001 |
| leucine                                         | 24%   | <0.0001 | 0.0001  |
| lignoceroyl sphingomyelin (d18:1/24:0)          | 13%   | 0.0003  | 0.0012  |
| linoleate (18:2n6)                              | 62%   | <0.0001 | 0.0001  |
| linolenoylcarnitine (C18:3)                     | -24%  | 0.0003  | 0.0012  |
| linoleoyl-arachidonoyl-glycerol (18:2/20:4) [1] | -5%   | 0.0162  | 0.0381  |
| linoleoyl-arachidonoyl-glycerol (18:2/20:4) [2] | -5%   | 0.0177  | 0.0407  |
| linoleoylcarnitine (C18:2)                      | -10%  | 0.0040  | 0.0118  |
| linoleoyl-linolenoyl-glycerol (18:2/18:3) [1]   | -48%  | 0.0012  | 0.0041  |
| linoleoyl-linoleoyl-glycerol (18:2/18:2) [1]    | -26%  | 0.0018  | 0.0059  |
| mannitol/sorbitol                               | -41%  | 0.0053  | 0.0146  |
| mannose                                         | 67%   | <0.0001 | <0.0001 |
| margaroylcarnitine (C17)                        | 66%   | <0.0001 | <0.0001 |
| myristoleoylcarnitine (C14:1)                   | 93%   | <0.0001 | 0.0001  |
| myristoyl dihydrosphingomyelin (d18:0/14:0)     | 90%   | <0.0001 | <0.0001 |
| myristoylcarnitine (C14)                        | 135%  | <0.0001 | <0.0001 |
| N1-methyladenosine                              | -8%   | 0.0001  | 0.0003  |
| N6.N6.N6-trimethyllysine                        | -25%  | 0.0017  | 0.0055  |
| N6.N6-dimethyllysine                            | -17%  | 0.0001  | 0.0003  |
| N6-carbamoylthreonyladenosine                   | -9%   | 0.0121  | 0.0293  |
| N6-carboxymethyllysine                          | 1613% | 0.0004  | 0.0015  |
| N-acetyl-1-methylhistidine                      | -55%  | <0.0001 | <0.0001 |
| N-acetyl-2-aminooctanoate                       | -36%  | 0.0015  | 0.0051  |
| N-acetyl-3-methylhistidine                      | -63%  | <0.0001 | 0.0002  |
| N-acetylarginine                                | -13%  | 0.0217  | 0.0475  |
| N-acetylaspargine                               | -16%  | 0.0028  | 0.0085  |
| N-acetylcarnosine                               | -6%   | 0.0161  | 0.0380  |
| N-acetylglutamate                               | 42%   | <0.0001 | <0.0001 |
| N-acetylglycine                                 | 60%   | <0.0001 | <0.0001 |
| N-acetylhistidine                               | 10%   | 0.0010  | 0.0035  |
| N-acetyl-isoptreanine                           | -18%  | <0.0001 | <0.0001 |
| N-acetylneuramate                               | 11%   | 0.0005  | 0.0020  |
| N-acetylphenylalanine                           | -28%  | <0.0001 | 0.0001  |
| N-acetylproline                                 | -34%  | <0.0001 | 0.0001  |
| N-acetylputrescine                              | -11%  | 0.0032  | 0.0097  |
| N-acetyltaurine                                 | -14%  | 0.0080  | 0.0204  |
| N-acetylthreonine                               | -6%   | 0.0212  | 0.0468  |
| N-acetyltryptophan                              | -41%  | <0.0001 | <0.0001 |
| N-acetyltyrosine                                | -20%  | 0.0024  | 0.0077  |
| N-behenoyl-sphingadienine (d18:2/22:0)          | -12%  | 0.0013  | 0.0044  |
| N-carbamoylalanine                              | -19%  | 0.0061  | 0.0165  |
| N-delta-acetylornithine                         | -20%  | 0.0051  | 0.0144  |
| nervonoylcarnitine (C24:1)                      | 27%   | 0.0209  | 0.0466  |

|                                                 |      |         |         |
|-------------------------------------------------|------|---------|---------|
| N-oleoyltaurine                                 | 128% | 0.0089  | 0.0225  |
| nonanoylcarnitine (C9)                          | 166% | <0.0001 | <0.0001 |
| N-palmitoylglycine                              | 11%  | 0.0203  | 0.0453  |
| N-palmitoyl-heptadecaspingosine (d17:1/16:0)    | 31%  | <0.0001 | 0.0001  |
| N-palmitoyl-sphingadienine (d18:2/16:0)         | 14%  | 0.0110  | 0.0271  |
| N-palmitoyl-sphinganine (d18:0/16:0)            | 81%  | <0.0001 | <0.0001 |
| N-palmitoyl-sphingosine (d18:1/16:0)            | 26%  | <0.0001 | <0.0001 |
| N-stearoyl-sphingadienine (d18:2/18:0)          | 542% | 0.0001  | 0.0007  |
| N-stearoyl-sphinganine (d18:0/18:0)             | 243% | <0.0001 | <0.0001 |
| N-stearoyl-sphingosine (d18:1/18:0)             | 49%  | <0.0001 | <0.0001 |
| o-cresol sulfate                                | -16% | 0.0025  | 0.0078  |
| octadecanedioate (C18-DC)                       | 128% | <0.0001 | 0.0002  |
| octadecanedioylcarnitine (C18-DC)               | 90%  | <0.0001 | <0.0001 |
| octadecenedioylcarnitine (C18:1-DC)             | 52%  | 0.0005  | 0.0018  |
| octanoylcarnitine (C8)                          | 143% | <0.0001 | <0.0001 |
| oleate/vaccenate (18:1)                         | 66%  | <0.0001 | 0.0001  |
| oleoyl-arachidonoyl-glycerol (18:1/20:4) [1]    | -8%  | 0.0216  | 0.0475  |
| oleoyl-linoleoyl-glycerol (18:1/18:2) [1]       | -13% | 0.0014  | 0.0047  |
| oleoyl-linoleoyl-glycerol (18:1/18:2) [2]       | -12% | 0.0044  | 0.0127  |
| oxalate (ethanedioate)                          | -8%  | 0.0149  | 0.0353  |
| palmitate (16:0)                                | 41%  | <0.0001 | <0.0001 |
| palmitoleate (16:1n7)                           | 24%  | 0.0007  | 0.0027  |
| palmitoleoylcarnitine (C16:1)                   | 35%  | 0.0066  | 0.0177  |
| palmitoleoyl-linoleoyl-glycerol (16:1/18:2) [1] | -29% | 0.0005  | 0.0019  |
| palmitoleoylcholine                             | -16% | 0.0042  | 0.0123  |
| palmitoyl dihydrosphingomyelin (d18:0/16:0)     | 38%  | <0.0001 | <0.0001 |
| palmitoyl sphingomyelin (d18:1/16:0)            | 12%  | <0.0001 | <0.0001 |
| palmitoylcarnitine (C16)                        | 20%  | 0.0007  | 0.0025  |
| paraxanthine                                    | 13%  | 0.0036  | 0.0108  |
| pentadecanoylcholine                            | 40%  | 0.0029  | 0.0088  |
| perfluorooctanoate (PFOA)                       | 4%   | 0.0117  | 0.0285  |
| phenylacetylcarnitine                           | 91%  | 0.0188  | 0.0429  |
| phosphate                                       | 7%   | 0.0001  | 0.0004  |
| phytanate                                       | 450% | <0.0001 | <0.0001 |
| picolinate                                      | 53%  | <0.0001 | 0.0001  |
| pristanate                                      | 590% | <0.0001 | <0.0001 |
| propionylcarnitine (C3)                         | 39%  | 0.0001  | 0.0004  |
| pseudouridine                                   | -7%  | 0.0002  | 0.0007  |
| pyruvate                                        | -27% | 0.0008  | 0.0029  |
| retinol (Vitamin A)                             | 5%   | 0.0199  | 0.0448  |
| ribonate                                        | -17% | 0.0024  | 0.0076  |
| ribulonate/xylulonate                           | -12% | 0.0074  | 0.0194  |
| S-allylcysteine                                 | -63% | 0.0005  | 0.0020  |
| sarcosine                                       | 48%  | 0.0001  | 0.0005  |
| sebacate (C10-DC)                               | 172% | 0.0003  | 0.0013  |

|                                                                |      |         |         |
|----------------------------------------------------------------|------|---------|---------|
| serine                                                         | 11%  | 0.0017  | 0.0055  |
| S-methylcysteine sulfoxide                                     | 104% | <0.0001 | <0.0001 |
| S-methylmethionine                                             | -80% | 0.0003  | 0.0013  |
| sphingomyelin (d17:1/14:0. d16:1/15:0)                         | 31%  | <0.0001 | <0.0001 |
| sphingomyelin (d17:1/16:0. d18:1/15:0. d16:1/17:0)             | 21%  | <0.0001 | <0.0001 |
| sphingomyelin (d17:2/16:0. d18:2/15:0)                         | 24%  | <0.0001 | <0.0001 |
| sphingomyelin (d18:0/18:0. d19:0/17:0)                         | 136% | <0.0001 | <0.0001 |
| sphingomyelin (d18:0/20:0. d16:0/22:0)                         | 71%  | <0.0001 | <0.0001 |
| sphingomyelin (d18:1/14:0. d16:1/16:0)                         | 22%  | <0.0001 | <0.0001 |
| sphingomyelin (d18:1/17:0. d17:1/18:0. d19:1/16:0)             | 37%  | <0.0001 | <0.0001 |
| sphingomyelin (d18:1/18:1. d18:2/18:0)                         | 29%  | <0.0001 | <0.0001 |
| sphingomyelin (d18:1/19:0. d19:1/18:0)                         | 28%  | <0.0001 | <0.0001 |
| sphingomyelin (d18:1/20:2. d18:2/20:1. d16:1/22:2)             | 77%  | 0.0008  | 0.0029  |
| sphingomyelin (d18:1/21:0. d17:1/22:0. d16:1/23:0)             | 18%  | <0.0001 | 0.0002  |
| sphingomyelin (d18:1/22:2. d18:2/22:1. d16:1/24:2)             | 20%  | 0.0003  | 0.0011  |
| sphingomyelin (d18:1/25:0. d19:0/24:1. d20:1/23:0. d19:1/24:0) | 46%  | <0.0001 | <0.0001 |
| sphingomyelin (d18:2/14:0. d18:1/14:1)                         | 18%  | <0.0001 | 0.0001  |
| sphingomyelin (d18:2/16:0. d18:1/16:1)                         | 9%   | 0.0007  | 0.0027  |
| sphingomyelin (d18:2/18:1)                                     | 61%  | <0.0001 | <0.0001 |
| sphingomyelin (d18:2/21:0. d16:2/23:0)                         | 40%  | <0.0001 | <0.0001 |
| sphingomyelin (d18:2/23:0. d18:1/23:1. d17:1/24:1)             | 22%  | <0.0001 | <0.0001 |
| sphingomyelin (d18:2/23:1)                                     | 36%  | <0.0001 | <0.0001 |
| sphingomyelin (d18:2/24:2)                                     | 12%  | 0.0149  | 0.0353  |
| stachydrine                                                    | -27% | 0.0107  | 0.0265  |
| stearate (18:0)                                                | 35%  | <0.0001 | 0.0001  |
| stearidonate (18:4n3)                                          | 46%  | 0.0007  | 0.0027  |
| stearoyl sphingomyelin (d18:1/18:0)                            | 31%  | <0.0001 | <0.0001 |
| stearoylcarnitine (C18)                                        | 25%  | 0.0007  | 0.0027  |
| suberate (C8-DC)                                               | 251% | <0.0001 | <0.0001 |
| suberoylcarnitine (C8-DC)                                      | 720% | <0.0001 | <0.0001 |
| succinylcarnitine (C4-DC)                                      | -10% | 0.0163  | 0.0381  |
| sucrose                                                        | 327% | 0.0024  | 0.0077  |
| sulfate                                                        | 23%  | <0.0001 | <0.0001 |
| tartronate (hydroxymalonate)                                   | -14% | 0.0053  | 0.0146  |
| tauro-beta-muricholate                                         | 364% | 0.0004  | 0.0015  |
| taurochenodeoxycholate                                         | 87%  | 0.0108  | 0.0267  |
| tetradecadienoate (14:2)                                       | 118% | <0.0001 | <0.0001 |
| tetradecanedioate (C14-DC)                                     | 197% | <0.0001 | <0.0001 |
| theophylline                                                   | 38%  | 0.0016  | 0.0052  |
| threonate                                                      | -6%  | 0.0180  | 0.0412  |
| thymol sulfate                                                 | 64%  | 0.0174  | 0.0403  |
| tiglylcarnitine (C5:1-DC)                                      | 153% | <0.0001 | <0.0001 |
| tricosanoyl sphingomyelin (d18:1/23:0)                         | 25%  | <0.0001 | <0.0001 |
| trigonelline (N-methylnicotinate)                              | -31% | 0.0135  | 0.0325  |
| tyrosine                                                       | 14%  | 0.0012  | 0.0040  |



|              |      |         |         |
|--------------|------|---------|---------|
| urea         | 51%  | <0.0001 | <0.0001 |
| valine       | 33%  | <0.0001 | <0.0001 |
| vanillactate | -21% | 0.0002  | 0.0010  |
| xanthurenate | 37%  | 0.0191  | 0.0430  |

**ESM Table 5.** Cardiorespiratory fitness and body composition at baseline and after the intervention period. Values are observed means  $\pm$  SD. Estimates with 95% CI and *p* values for the effect compared to the control group, from linear mixed models.

|                                                                 | <b>Baseline<br/>(Visit 1)</b>   | <b>At study<br/>completion<br/>(Visit 3)</b> | <b>Estimate</b> | <b>95% CI</b> | <b><i>p</i> value</b> |
|-----------------------------------------------------------------|---------------------------------|----------------------------------------------|-----------------|---------------|-----------------------|
|                                                                 | <b>Mean <math>\pm</math> SD</b> | <b>Mean <math>\pm</math> SD</b>              |                 |               |                       |
| <b>VO<sub>2</sub>peak (ml kg<sup>-1</sup> min<sup>-1</sup>)</b> |                                 |                                              |                 |               |                       |
| Control                                                         | 29.0 $\pm$ 4.3                  | 28.5 $\pm$ 3.9                               |                 |               |                       |
| EXam                                                            | 28.5 $\pm$ 6.1                  | 29.7 $\pm$ 6.2                               | 1.3             | 0.5 to 2.0    | <b>0.003</b>          |
| EXpm                                                            | 31.2 $\pm$ 4.4                  | 33.4 $\pm$ 5.0                               | 1.4             | 0.6 to 2.2    | <b>0.001</b>          |
| <b>Peak power output (W)</b>                                    |                                 |                                              |                 |               |                       |
| Control                                                         | 193 $\pm$ 33                    | 191 $\pm$ 34                                 |                 |               |                       |
| EXam                                                            | 209 $\pm$ 65                    | 220 $\pm$ 65                                 | 6.8             | 0.5 to 13.1   | <b>0.04</b>           |
| EXpm                                                            | 208 $\pm$ 26                    | 234 $\pm$ 29                                 | 14.4            | 8.1 to 20.7   | <b>&lt;0.001</b>      |
| <b>Body mass (kg)</b>                                           |                                 |                                              |                 |               |                       |
| Control                                                         | 94.5 $\pm$ 10.4                 | 95.4 $\pm$ 9.8                               |                 |               |                       |
| EXam                                                            | 103.1 $\pm$ 16.1                | 102.1 $\pm$ 15.9                             | 1.6             | -1.9 to 5.2   | 0.36                  |
| EXpm                                                            | 99.3 $\pm$ 8.1                  | 98.6 $\pm$ 8.3                               | 1.8             | -1.8 to 5.3   | 0.32                  |
| <b>Waist circumference (cm)</b>                                 |                                 |                                              |                 |               |                       |
| Control                                                         | 107.6 $\pm$ 5.9                 | 105.9 $\pm$ 5.4                              |                 |               |                       |
| EXam                                                            | 110.7 $\pm$ 10.5                | 110.7 $\pm$ 10.2                             | 1.2             | -0.4 to 2.8   | 0.13                  |
| EXpm                                                            | 109.1 $\pm$ 8.3                 | 106.8 $\pm$ 8.7                              | -0.2            | -1.6 to 1.3   | 0.84                  |
| <b>Waist-hip ratio</b>                                          |                                 |                                              |                 |               |                       |
| Control                                                         | 0.99 $\pm$ 0.07                 | 0.98 $\pm$ 0.07                              |                 |               |                       |
| EXam                                                            | 0.97 $\pm$ 0.05                 | 0.97 $\pm$ 0.04                              | 0.01            | -0.01 to 0.02 | 0.37                  |
| EXpm                                                            | 0.97 $\pm$ 0.06                 | 0.95 $\pm$ 0.06                              | 0.00            | -0.01 to 0.1  | 0.55                  |
| <b>Fat mass (kg)</b>                                            |                                 |                                              |                 |               |                       |
| Control                                                         | 31.3 $\pm$ 3.0                  | 31.1 $\pm$ 3.2                               |                 |               |                       |
| EXam                                                            | 36.1 $\pm$ 7.0                  | 35.2 $\pm$ 7.0                               | -0.29           | -0.68 to 0.10 | 0.14                  |
| EXpm                                                            | 32.9 $\pm$ 5.3                  | 32.7 $\pm$ 5.4                               | -0.01           | -0.39 to 0.38 | 0.98                  |
| <b>Fat free mass (kg)</b>                                       |                                 |                                              |                 |               |                       |
| Control                                                         | 65.4 $\pm$ 9.0                  | 64.7 $\pm$ 9.0                               |                 |               |                       |
| EXam                                                            | 67.2 $\pm$ 10.1                 | 66.7 $\pm$ 9.6                               | 0.13            | -0.34 to 0.61 | 0.57                  |
| EXpm                                                            | 66.7 $\pm$ 3.9                  | 66.0 $\pm$ 3.8                               | 0.07            | -0.41 to 0.55 | 0.77                  |
| <b>Visceral fat mass (g)</b>                                    |                                 |                                              |                 |               |                       |
| Control                                                         | 1969 $\pm$ 495                  | 1906 $\pm$ 475                               |                 |               |                       |
| EXam                                                            | 2013 $\pm$ 1424                 | 1826 $\pm$ 1382                              | -61             | -122 to 0.4   | 0.05                  |
| EXpm                                                            | 1479 $\pm$ 573                  | 1356 $\pm$ 508                               | -0.34           | -96 to 27     | 0.26                  |

**ESM Table 6.** Fasting and postprandial circulating markers of metabolic health and blood pressure after five days of high-fat diet (HFD) and at study completion, according to group. Values are observed means  $\pm$  SD. Estimates with 95% CI and *p* values for the interaction between time and group, from linear mixed models. Data were log or square root transformed when they had non-normal distribution (insulin, triacylglycerol, HOMA-IR, morning LDL). Estimates and 95% CIs for log-transformed variables are reported (in brackets). EXam = morning exercise, EXpm = evening exercise.

|                                         | After 5 d<br>high-fat diet | At study<br>completion | Estimate | 95% CI           | <i>p</i> value   |
|-----------------------------------------|----------------------------|------------------------|----------|------------------|------------------|
| <b>MORNING (fasting)</b>                |                            |                        |          |                  |                  |
| <b>Glucose (mmol/l)</b>                 |                            |                        |          |                  |                  |
| Control                                 | 4.8 $\pm$ 0.2              | 4.7 $\pm$ 0.3          |          |                  |                  |
| EXam                                    | 4.9 $\pm$ 0.5              | 4.8 $\pm$ 0.3          | 0.01     | -0.09 to 0.12    | 0.85             |
| EXpm                                    | 4.6 $\pm$ 0.2              | 4.4 $\pm$ 0.2          | -0.12    | -0.23 to -0.02   | <b>0.02</b>      |
| <b>Insulin (pmol/l)</b>                 |                            |                        |          |                  |                  |
| Control                                 | 70 $\pm$ 35                | 59 $\pm$ 33            |          |                  |                  |
| EXam                                    | 74 $\pm$ 52                | 36 $\pm$ 19            | (-0.46)  | (-1.21 to 0.30)  | 0.22             |
| EXpm                                    | 40 $\pm$ 24                | 24 $\pm$ 10            | (-0.94)  | (-1.69 to -0.19) | <b>0.02</b>      |
| <b>HOMA-IR</b>                          |                            |                        |          |                  |                  |
| Control                                 | 2.67 $\pm$ 1.7             | 1.58 $\pm$ 1.3         |          |                  |                  |
| EXam                                    | 2.33 $\pm$ 1.2             | 1.48 $\pm$ 0.8         | (-0.09)  | (-0.24 to 0.05)  | 0.20             |
| EXpm                                    | 1.63 $\pm$ 1.2             | 1.15 $\pm$ 0.6         | (-0.18)  | (-0.33 to -0.04) | <b>0.01</b>      |
| <b>Cholesterol (mmol/l)</b>             |                            |                        |          |                  |                  |
| Control                                 | 5.1 $\pm$ 0.8              | 4.9 $\pm$ 0.8          |          |                  |                  |
| EXam                                    | 5.1 $\pm$ 0.6              | 4.6 $\pm$ 0.4          | -0.14    | -0.35 to 0.07    | 0.19             |
| EXpm                                    | 4.3 $\pm$ 0.6              | 3.7 $\pm$ 0.5          | -0.38    | -0.59 to -0.18   | <b>&lt;0.001</b> |
| <b>HDL (mmol/l)</b>                     |                            |                        |          |                  |                  |
| Control                                 | 1.01 $\pm$ 0.2             | 0.99 $\pm$ 0.2         |          |                  |                  |
| EXam                                    | 1.02 $\pm$ 0.1             | 1.00 $\pm$ 0.1         | 0.02     | -0.03 to 0.07    | 0.36             |
| EXpm                                    | 1.10 $\pm$ 0.2             | 1.01 $\pm$ 0.1         | -0.02    | -0.07 to 0.03    | 0.37             |
| <b>LDL (mmol/l)</b>                     |                            |                        |          |                  |                  |
| Control                                 | 3.4 $\pm$ 0.7              | 3.3 $\pm$ 0.7          |          |                  |                  |
| EXam                                    | 3.3 $\pm$ 0.8              | 3.1 $\pm$ 0.4          | (-0.01)  | (-0.04 to 0.02)  | 0.61             |
| EXpm                                    | 2.9 $\pm$ 0.5              | 2.4 $\pm$ 0.5          | (-0.05)  | (-0.08 to -0.02) | <b>0.001</b>     |
| <b>Triacylglycerol (mmol/l)</b>         |                            |                        |          |                  |                  |
| Control                                 | 1.48 $\pm$ 0.6             | 1.35 $\pm$ 0.6         |          |                  |                  |
| EXam                                    | 1.44 $\pm$ 0.8             | 0.97 $\pm$ 0.3         | (-0.04)  | (-0.10 to 0.01)  | 0.09             |
| EXpm                                    | 0.83 $\pm$ 0.1             | 0.68 $\pm$ 0.1         | (-0.09)  | (-0.14 to -0.03) | <b>0.002</b>     |
| <b>Systolic blood pressure (mm Hg)</b>  |                            |                        |          |                  |                  |
| Control                                 | 129 $\pm$ 9                | 129 $\pm$ 11           |          |                  |                  |
| EXam                                    | 125 $\pm$ 11               | 124 $\pm$ 4            | -1.1     | -4.3 to 2.1      | 0.50             |
| EXpm                                    | 122 $\pm$ 10               | 127 $\pm$ 6            | -0.9     | -4.5 to 2.0      | 0.42             |
| <b>Diastolic blood pressure (mm Hg)</b> |                            |                        |          |                  |                  |
| Control                                 | 84 $\pm$ 4                 | 87 $\pm$ 9             |          |                  |                  |
| EXam                                    | 80 $\pm$ 5                 | 80 $\pm$ 2             | -1.6     | -3.6 to 0.4      | 0.12             |
| EXpm                                    | 82 $\pm$ 6                 | 83 $\pm$ 4             | -1.4     | -3.4 to 0.6      | 0.17             |
| <b>EVENING (postprandial)</b>           |                            |                        |          |                  |                  |
| <b>Glucose (mmol/l)</b>                 |                            |                        |          |                  |                  |
| Control                                 | 5.2 $\pm$ 0.4              | 5.1 $\pm$ 0.5          |          |                  |                  |
| EXam                                    | 4.9 $\pm$ 0.4              | 4.7 $\pm$ 0.5          | -0.11    | -0.26 to 0.03    | 0.12             |
| EXpm                                    | 5.2 $\pm$ 0.8              | 4.6 $\pm$ 0.3          | -0.12    | -0.26 to 0.03    | 0.11             |
| <b>Insulin (pmol/l)</b>                 |                            |                        |          |                  |                  |
| Control                                 | 432 $\pm$ 252              | 283 $\pm$ 145          |          |                  |                  |
| EXam                                    | 189 $\pm$ 130              | 129 $\pm$ 65           | (-2.13)  | (-3.67 to -0.60) | <b>0.008</b>     |
| EXpm                                    | 230 $\pm$ 161              | 139 $\pm$ 99           | (-1.89)  | (-3.42 to 0.35)  | <b>0.02</b>      |

|                                         |            |            |         |                  |              |
|-----------------------------------------|------------|------------|---------|------------------|--------------|
| <b>Cholesterol (mmol/l)</b>             |            |            |         |                  |              |
| Control                                 | 5.4 ± 0.8  | 5.1 ± 0.7  |         |                  |              |
| EXam                                    | 5.3 ± 0.8  | 4.7 ± 0.6  | -0.15   | -0.37 to 0.07    | 0.18         |
| EXpm                                    | 4.5 ± 0.7  | 3.9 ± 0.5  | -0.37   | -0.59 to -0.15   | <b>0.002</b> |
| <b>Triacylglycerol (mmol/l)</b>         |            |            |         |                  |              |
| Control                                 | 2.97 ± 1.2 | 2.29 ± 0.6 |         |                  |              |
| EXam                                    | 2.09 ± 0.7 | 1.78 ± 0.9 | (-0.05) | (-0.11 to 0.01)  | 0.10         |
| EXpm                                    | 1.73 ± 0.7 | 1.20 ± 0.3 | (-0.09) | (-0.15 to -0.04) | <b>0.003</b> |
| <b>HDL (mmol/l)</b>                     |            |            |         |                  |              |
| Control                                 | 1.02 ± 0.1 | 1.01 ± 0.1 |         |                  |              |
| EXam                                    | 1.05 ± 0.1 | 1.01 ± 0.1 | 0.00    | -0.04 to 0.05    | 0.90         |
| EXpm                                    | 1.12 ± 0.2 | 1.07 ± 0.2 | 0.01    | -0.04 to 0.05    | 0.73         |
| <b>LDL (mmol/l)</b>                     |            |            |         |                  |              |
| Control                                 | 3.1 ± 0.9  | 3.0 ± 0.8  |         |                  |              |
| EXam                                    | 3.2 ± 0.7  | 2.9 ± 0.4  | -0.10   | -0.30 to 0.11    | 0.36         |
| EXpm                                    | 2.6 ± 0.5  | 2.3 ± 0.4  | -0.25   | -0.45 to -0.04   | <b>0.02</b>  |
| <b>Systolic blood pressure (mm Hg)</b>  |            |            |         |                  |              |
| Control                                 | 132 ± 5    | 132 ± 9    |         |                  |              |
| EXam                                    | 133 ± 9    | 129 ± 8    | -0.9    | -3.4 to 1.6      | 0.47         |
| EXpm                                    | 131 ± 6    | 132 ± 4    | -0.1    | -2.6 to 2.4      | 0.94         |
| <b>Diastolic blood pressure (mm Hg)</b> |            |            |         |                  |              |
| Control                                 | 86 ± 7     | 88 ± 6     |         |                  |              |
| EXam                                    | 84 ± 6     | 83 ± 6     | -1.6    | -3.6 to 0.4      | 0.11         |
| EXpm                                    | 86 ± 6     | 84 ± 5     | -1.3    | -3.3 to 0.7      | 0.19         |

**ESM Table 7.** Fasting and postprandial circulating markers of metabolic health and blood pressure after five days of high-fat diet (HFD) and at study completion, according to group. Values are observed means  $\pm$  SD. Estimates with 95% CI and *p* values for the effect of evening exercise (EXpm) compared to morning exercise (EXAm), from linear mixed models. Data were log or square root transformed when they had non-normal distribution (insulin, triacylglycerol, HOMA-IR, morning LDL). Estimates and 95% CIs for log-transformed variables are reported (in brackets).

|                                         | After 5 d<br>high-fat diet | At study<br>completion | Estimate | 95% CI           | <i>p</i> value |
|-----------------------------------------|----------------------------|------------------------|----------|------------------|----------------|
| <b>MORNING (fasting)</b>                |                            |                        |          |                  |                |
| <b>Glucose (mmol/l)</b>                 |                            |                        |          |                  |                |
| EXAm                                    | 4.9 $\pm$ 0.5              | 4.8 $\pm$ 0.3          |          |                  |                |
| EXpm                                    | 4.6 $\pm$ 0.2              | 4.4 $\pm$ 0.2          | -0.15    | -0.24 to -0.03   | <b>0.02</b>    |
| <b>Insulin (pmol/l)</b>                 |                            |                        |          |                  |                |
| EXAm                                    | 74 $\pm$ 52                | 36 $\pm$ 19            |          |                  |                |
| EXpm                                    | 40 $\pm$ 24                | 24 $\pm$ 10            | (-0.48)  | (-1.23 to -0.27) | 0.20           |
| <b>HOMA-IR</b>                          |                            |                        |          |                  |                |
| EXAm                                    | 2.33 $\pm$ 1.2             | 1.48 $\pm$ 0.8         |          |                  |                |
| EXpm                                    | 1.63 $\pm$ 1.2             | 1.15 $\pm$ 0.6         | (-0.09)  | (-0.24 to 0.06)  | 0.22           |
| <b>Cholesterol (mmol/l)</b>             |                            |                        |          |                  |                |
| EXAm                                    | 5.1 $\pm$ 0.6              | 4.6 $\pm$ 0.4          |          |                  |                |
| EXpm                                    | 4.3 $\pm$ 0.6              | 3.7 $\pm$ 0.5          | -0.25    | -0.46 to -0.04   | <b>0.02</b>    |
| <b>HDL (mmol/l)</b>                     |                            |                        |          |                  |                |
| EXAm                                    | 1.02 $\pm$ 0.1             | 1.00 $\pm$ 0.1         |          |                  |                |
| EXpm                                    | 1.10 $\pm$ 0.2             | 1.01 $\pm$ 0.1         | -0.04    | -0.09 to 0.00    | 0.08           |
| <b>LDL (mmol/l)</b>                     |                            |                        |          |                  |                |
| EXAm                                    | 3.3 $\pm$ 0.8              | 3.1 $\pm$ 0.4          |          |                  |                |
| EXpm                                    | 2.9 $\pm$ 0.5              | 2.4 $\pm$ 0.5          | (-0.04)  | (-0.07 to -0.01) | <b>0.006</b>   |
| <b>Triacylglycerol (mmol/l)</b>         |                            |                        |          |                  |                |
| EXAm                                    | 1.44 $\pm$ 0.8             | 0.97 $\pm$ 0.3         |          |                  |                |
| EXpm                                    | 0.83 $\pm$ 0.1             | 0.68 $\pm$ 0.1         | (-0.04)  | (-0.09 to 0.01)  | 0.12           |
| <b>Systolic blood pressure (mm Hg)</b>  |                            |                        |          |                  |                |
| EXAm                                    | 125 $\pm$ 11               | 124 $\pm$ 4            |          |                  |                |
| EXpm                                    | 122 $\pm$ 10               | 127 $\pm$ 6            | -0.2     | -3.5 to 2.0      | 0.89           |
| <b>Diastolic blood pressure (mm Hg)</b> |                            |                        |          |                  |                |
| EXAm                                    | 80 $\pm$ 5                 | 80 $\pm$ 2             |          |                  |                |
| EXpm                                    | 82 $\pm$ 6                 | 83 $\pm$ 4             | -0.2     | -1.9 to 2.2      | 0.17           |
| <b>EVENING (postprandial)</b>           |                            |                        |          |                  |                |
| <b>Glucose (mmol/l)</b>                 |                            |                        |          |                  |                |
| EXAm                                    | 4.9 $\pm$ 0.4              | 4.7 $\pm$ 0.5          |          |                  |                |
| EXpm                                    | 5.2 $\pm$ 0.8              | 4.6 $\pm$ 0.3          | -0.003   | -0.15 to 0.14    | 0.96           |
| <b>Insulin (pmol/l)</b>                 |                            |                        |          |                  |                |
| EXAm                                    | 189 $\pm$ 130              | 129 $\pm$ 65           |          |                  |                |
| EXpm                                    | 230 $\pm$ 161              | 139 $\pm$ 99           | (0.25)   | (-1.29 to 1.78)  | 0.74           |
| <b>Cholesterol (mmol/l)</b>             |                            |                        |          |                  |                |
| EXAm                                    | 5.3 $\pm$ 0.8              | 4.7 $\pm$ 0.6          |          |                  |                |
| EXpm                                    | 4.5 $\pm$ 0.7              | 3.9 $\pm$ 0.5          | -0.21    | -0.44 to 0.01    | 0.06           |
| <b>Triacylglycerol (mmol/l)</b>         |                            |                        |          |                  |                |
| EXAm                                    | 2.09 $\pm$ 0.7             | 1.78 $\pm$ 0.9         |          |                  |                |
| EXpm                                    | 1.73 $\pm$ 0.7             | 1.20 $\pm$ 0.3         | (-0.05)  | (-0.10 to 0.01)  | 0.12           |
| <b>HDL (mmol/l)</b>                     |                            |                        |          |                  |                |
| EXAm                                    | 1.05 $\pm$ 0.1             | 1.01 $\pm$ 0.1         |          |                  |                |
| EXpm                                    | 1.12 $\pm$ 0.2             | 1.07 $\pm$ 0.2         | 0.004    | -0.04 to 0.05    | 0.84           |
| <b>LDL (mmol/l)</b>                     |                            |                        |          |                  |                |
| EXAm                                    | 3.2 $\pm$ 0.7              | 2.9 $\pm$ 0.4          |          |                  |                |

|                                         |           |           |       |               |      |
|-----------------------------------------|-----------|-----------|-------|---------------|------|
| EXpm                                    | 2.6 ± 0.5 | 2.3 ± 0.4 | -0.15 | -0.36 to 0.06 | 0.15 |
| <b>Systolic blood pressure (mm Hg)</b>  |           |           |       |               |      |
| EXam                                    | 133 ± 9   | 129 ± 8   |       |               |      |
| EXpm                                    | 131 ± 6   | 132 ± 4   | 0.8   | -1.7 to 3.3   | 0.52 |
| <b>Diastolic blood pressure (mm Hg)</b> |           |           |       |               |      |
| EXam                                    | 84 ± 6    | 83 ± 6    |       |               |      |
| EXpm                                    | 86 ± 6    | 84 ± 5    | -0.3  | -1.7 to 2.3   | 0.77 |

**ESM Table 8.** Metabolites differently changed in morning samples after evening exercise compared to no exercise, using linear mixed model.

|                                                        | Change (%) after morning exercise (EXAm) | Change (%) after evening exercise (EXpm) | Change (%) after no exercise (CON) | <i>q</i> value between-group difference between EXpm and CON |
|--------------------------------------------------------|------------------------------------------|------------------------------------------|------------------------------------|--------------------------------------------------------------|
| androsterone sulfate                                   | 12.2                                     | 33.4                                     | -9.9                               | <0.0001                                                      |
| epiandrosterone sulfate                                | 10.9                                     | 40.5                                     | -6.2                               | <0.0001                                                      |
| 5alpha-androstan-3alpha,17beta-diol monosulfate (1)    | 8.8                                      | 38.4                                     | -15.0                              | <0.0001                                                      |
| andro steroid monosulfate C19H28O6S (1)                | 46.8                                     | 64.4                                     | -4.5                               | <0.0001                                                      |
| 16a-hydroxy DHEA 3-sulfate                             | 34.8                                     | 64.2                                     | -1.6                               | <0.0001                                                      |
| carnitine                                              | -6.8                                     | -10.5                                    | 3.6                                | <0.0001                                                      |
| 1-oleoyl-2-docosahexaenoyl-GPC (18:1/22:6)             | -6.7                                     | -17.5                                    | 3.3                                | 0.001                                                        |
| 5alpha-androstan-3beta,17beta-diol monosulfate (2)     | 17.8                                     | 45.9                                     | -16.4                              | 0.001                                                        |
| androstenediol (3beta,17beta) disulfate (2)            | 11.3                                     | 19.2                                     | -0.6                               | 0.002                                                        |
| 1-stearoyl-2-oleoyl-GPC (18:0/18:1)                    | -10.2                                    | -16.7                                    | -1.8                               | 0.002                                                        |
| 1-palmitoleoyl-2-linolenoyl-GPC (16:1/18:3)            | -20.0                                    | -38.2                                    | -1.8                               | 0.002                                                        |
| tryptophan                                             | -5.6                                     | -6.4                                     | 3.1                                | 0.003                                                        |
| dehydroisoandrosterone sulfate (DHEA-S)                | -1.4                                     | 18.0                                     | -4.7                               | 0.004                                                        |
| alpha-hydroxyisovalerate                               | 56.8                                     | 64.5                                     | -6.3                               | 0.004                                                        |
| gamma-glutamylglycine                                  | 1.4                                      | -9.2                                     | 16.7                               | 0.005                                                        |
| 1-linoleoylglycerol (18:2)                             | -20.2                                    | 11.2                                     | -29.0                              | 0.007                                                        |
| pyroglutamine                                          | -8.8                                     | -17.4                                    | 4.0                                | 0.007                                                        |
| N-acetylthreonine                                      | -7.6                                     | -9.7                                     | 3.3                                | 0.007                                                        |
| 2-hydroxy-3-methylvalerate                             | 19.4                                     | 62.5                                     | -5.8                               | 0.007                                                        |
| hippurate                                              | -11.3                                    | 156.1                                    | 44.8                               | 0.007                                                        |
| acetoacetate                                           | 130.8                                    | 222.4                                    | 24.9                               | 0.007                                                        |
| 3-hydroxybutyrylglycine                                | 157.4                                    | 176.5                                    | 11.8                               | 0.008                                                        |
| 1-palmitoyl-2-dihomo-linolenoyl-GPC (16:0/20:3n3 or 6) | -11.5                                    | -18.7                                    | -4.0                               | 0.008                                                        |
| androstenediol (3alpha, 17alpha) monosulfate (3)       | -4.3                                     | 11.0                                     | -4.5                               | 0.008                                                        |
| gamma-glutamylserine                                   | 12.9                                     | -4.5                                     | 19.1                               | 0.008                                                        |
| suberate (C8-DC)                                       | 171.4                                    | 291.1                                    | 35.6                               | 0.010                                                        |
| 2-hydroxybutyrate/2-hydroxyisobutyrate                 | 47.0                                     | 71.4                                     | -3.8                               | 0.010                                                        |
| azelate (C9-DC)                                        | 109.7                                    | 341.9                                    | 128.8                              | 0.010                                                        |
| sphingomyelin (d17:1/14:0, d16:1/15:0)                 | -19.1                                    | -20.9                                    | 1.3                                | 0.012                                                        |
| androstenediol (3beta,17beta) monosulfate (1)          | -1.1                                     | 18.9                                     | -11.0                              | 0.012                                                        |
| beta-hydroxybutyrate (βOHB)                            | 184.7                                    | 379.2                                    | 25.5                               | 0.015                                                        |
| dihydroorotate                                         | 0.9                                      | -5.1                                     | 15.3                               | 0.015                                                        |
| isobutyrylglycine                                      | 57.5                                     | 44.2                                     | -26.7                              | 0.022                                                        |
| 2-methylcitrate/homocitrate                            | 6.2                                      | 28.3                                     | -5.5                               | 0.023                                                        |
| succinylcarnitine (C4-DC)                              | -15.0                                    | -37.4                                    | -11.2                              | 0.024                                                        |
| sphingomyelin (d18:2/14:0, d18:1/14:1)                 | -14.9                                    | -20.2                                    | -2.3                               | 0.024                                                        |
| indolelactate                                          | 22.6                                     | 30.1                                     | 4.0                                | 0.024                                                        |
| androstenediol (3beta,17beta) disulfate (1)            | 4.5                                      | 6.5                                      | -15.8                              | 0.026                                                        |
| 3-hydroxysebacate                                      | 44.6                                     | 89.5                                     | -17.9                              | 0.028                                                        |
| 3-hydroxybutyrylcarnitine (1)                          | 145.1                                    | 187.6                                    | 16.5                               | 0.029                                                        |
| 5alpha-androstan-3beta,17beta-diol disulfate           | 2.9                                      | 3.3                                      | -13.4                              | 0.029                                                        |
| 6-bromotryptophan                                      | 1.9                                      | -22.1                                    | -0.3                               | 0.029                                                        |
| propionylcarnitine (C3)                                | -23.7                                    | -29.2                                    | -6.7                               | 0.030                                                        |
| pantothenate                                           | 6.7                                      | 12.2                                     | -5.9                               | 0.032                                                        |
| hexanoylglycine                                        | 119.4                                    | 138.6                                    | 113.9                              | 0.033                                                        |
| citrate                                                | 34.1                                     | 52.0                                     | 10.9                               | 0.041                                                        |
| mannonate                                              | 1.2                                      | -4.2                                     | 14.0                               | 0.046                                                        |
| tyrosine                                               | -4.1                                     | -9.7                                     | 2.1                                | 0.046                                                        |

|                                               |       |       |       |       |
|-----------------------------------------------|-------|-------|-------|-------|
| myristoyl dihydrosphingomyelin (d18:0/14:0)   | -21.1 | -17.8 | -3.7  | 0.046 |
| N-acetyl glycine                              | 53.5  | 37.6  | 12.5  | 0.046 |
| aconitate [cis or trans]                      | 28.4  | 57.2  | 18.9  | 0.046 |
| ceramide (d16:1/24:1, d18:1/22:1)             | -12.9 | -20.0 | 3.0   | 0.046 |
| creatine                                      | -17.9 | -26.7 | -3.2  | 0.046 |
| 4-methylcatechol sulfate                      | -3.6  | 81.9  | 7.7   | 0.046 |
| 1-myristoyl-2-arachidonoyl-GPC (14:0/20:4)    | -29.9 | -37.5 | -12.6 | 0.046 |
| 5alpha-androstan-3beta,17alpha-diol disulfate | 8.5   | 32.3  | -2.1  | 0.048 |

**ESM Table 9.** Metabolites differently changed in evening samples with evening exercise compared to no exercise, using linear mixed model.

|                                                        | Change (%) after morning exercise (EXam) | Change (%) after evening exercise (EXpm) | Change (%) after no exercise (CON) | <i>q</i> value between-group difference between EXpm and CON |
|--------------------------------------------------------|------------------------------------------|------------------------------------------|------------------------------------|--------------------------------------------------------------|
| androsterone sulfate                                   | 13.10                                    | 41.980                                   | -7.239                             | <0.0001                                                      |
| epiandrosterone sulfate                                | 15.16                                    | 48.003                                   | -3.343                             | 0.0004                                                       |
| 5alpha-androstan-3alpha,17beta-diol monosulfate (1)    | 15.35                                    | 39.303                                   | -9.318                             | 0.0017                                                       |
| 1-palmitoyl-2-dihomo-linolenoyl-GPC (16:0/20:3n3 or 6) | -10.85                                   | -14.717                                  | -1.195                             | 0.0080                                                       |
| 5alpha-androstan-3beta,17beta-diol monosulfate (2)     | 20.74                                    | 50.269                                   | -11.331                            | 0.0117                                                       |
| betaine                                                | -2.82                                    | 4.880                                    | -11.805                            | 0.0129                                                       |
| alpha-hydroxyisovalerate                               | 31.02                                    | 55.338                                   | -14.765                            | 0.0232                                                       |
